# Supplementary material for: Molecular evolution of the ependymin protein family: a necessary update
Source: PubMed Central journal article supplement (PMC1805737; doi:10.1186/1471-2148-7-23), 2007-02-15
Supplement: 1471-2148-7-23-S5.pdf [file 1471-2148-7-23-S5.pdf]

**Table S4.** Parameter estimates of  $\omega$  ratios, log-likelihood scores and LRT statistics for the ependymin data under different branch-, site-, and branch-site models of codon evolution. (References provided in the Additional file 2: Additional\_Text.pdf)

| Model                                                                                                                                                                                                              | Estimates of Parameters                                                                                              | $\ell^a$  | LRT <sup>b</sup>               | df <sup>c</sup> | <i>p</i> Value | PSS <sup>d</sup> |
|--------------------------------------------------------------------------------------------------------------------------------------------------------------------------------------------------------------------|----------------------------------------------------------------------------------------------------------------------|-----------|--------------------------------|-----------------|----------------|------------------|
| <b><i>M0</i></b> : $\omega_o = \omega_{\text{FishBrain}} = \omega_{\text{FishTj}} = \omega_{\text{MERPs}}$                                                                                                         | $\omega_o = 0.155$                                                                                                   | -27658.44 |                                |                 |                | None             |
| <b>Postduplication and Postspeiation (PD-PS) Models [51]</b>                                                                                                                                                       |                                                                                                                      |           |                                |                 |                |                  |
| <b><i>Mps1</i></b> : $\omega_b$ ; $\omega_{\text{MERPs(PD)}} = \omega_{\text{FishBrain(PD)}} = \omega_{\text{FishTj(PD)}}; \omega_{\text{MERPs(PS)}} = \omega_{\text{FishBrain(PS)}} = \omega_{\text{FishTj(PS)}}$ | $\omega_{\text{(PD)}} = 1.139, \omega_{\text{(PS)}} = 0.161, \omega_b = 0.056$                                       | -27650.30 | M0 vs. <i>Mps</i> <sub>1</sub> | 2               | 0.0003         |                  |
| <b><i>Mps2</i></b> : $\omega_b = \omega_{\text{MERPs}}; \omega_{\text{FishBrain(PD)}} = \omega_{\text{FishTj(PD)}}; \omega_{\text{FishBrain(PS)}} = \omega_{\text{FishTj(PS)}}$                                    | $\omega_{\text{(PD)}} = 1.983, \omega_{\text{(PS)}} = 0.180, \omega_b = 0.114$                                       | -27644.73 | M0 vs. <i>Mps</i> <sub>2</sub> | 2               | < 0.0001       |                  |
| <b>Paralog Models [51]</b>                                                                                                                                                                                         |                                                                                                                      |           |                                |                 |                |                  |
| <b><i>Mp1</i></b> : $\omega_b; \omega_{\text{FishBrain}}; \omega_{\text{FishTj}}; \omega_{\text{MERPs}}$                                                                                                           | $\omega_{\text{FishBrain}} = 0.175; \omega_{\text{FishTj}} = 0.198; \omega_{\text{MERPs}} = 0.123; \omega_b = 0.057$ | -27641.01 | M0 vs. <i>Mp</i> <sub>1</sub>  | 3               | < 0.0001       |                  |
| <b><i>Mp2</i></b> : $\omega_b = \omega_{\text{MERPs}}; \omega_{\text{FishBrain}}; \omega_{\text{FishTj}}$                                                                                                          | $\omega_{\text{FishBrain}} = 0.175; \omega_{\text{FishTj}} = 0.198; \omega_{\text{MERPs}} = \omega_b = 0.114$        | -27644.89 | M0 vs. <i>Mp</i> <sub>2</sub>  | 2               | < 0.0001       |                  |
| <b><i>Mp3</i></b> : $\omega_b; \omega_{\text{MERPs}}; \omega_{\text{Non-MERPs}}$                                                                                                                                   | $\omega_{\text{MERPs}} = 0.1221; \omega_{\text{Non-MERPs}} = 0.1793; \omega_b = 0.068$                               | -27644.35 | M0 vs. <i>Mp</i> <sub>3</sub>  | 2               | < 0.0001       |                  |
| <b>Site - Models (Separate groups) [52-54]</b>                                                                                                                                                                     |                                                                                                                      |           |                                |                 |                |                  |
| <b><i>Model 0: One-ratio</i></b>                                                                                                                                                                                   |                                                                                                                      |           |                                |                 |                |                  |
| FishBrain (32 Taxa)                                                                                                                                                                                                | $\omega_o = 0.182$                                                                                                   | -9390.26  |                                |                 |                |                  |
| FishTj (12 Taxa)                                                                                                                                                                                                   | $\omega_o = 0.195$                                                                                                   | -6681.65  |                                |                 |                |                  |
| MERPs (17 Taxa)                                                                                                                                                                                                    | $\omega_o = 0.115$                                                                                                   | -6147.06  |                                |                 |                |                  |
| Basal (8 Taxa)                                                                                                                                                                                                     | $\omega_o = 0.051$                                                                                                   | -5050.18  |                                |                 |                |                  |

**Model 3: Discrete (K = 3)**

|                     |                                                                                                      |          |                      |   |          |      |
|---------------------|------------------------------------------------------------------------------------------------------|----------|----------------------|---|----------|------|
| FishBrain (32 Taxa) | $\omega_0 = 0.004, p_0 = 0.099, \omega_1 = 0.114,$<br>$p_1 = 0.498, \omega_2 = 0.414, (p_2 = 0.403)$ | -9215.15 | M0 vs. M3<br>(K = 3) | 4 | < 0.0001 | None |
| FishTj (12 Taxa)    | $\omega_0 = 0.014, p_0 = 0.184, \omega_1 = 0.153,$<br>$p_1 = 0.415, \omega_2 = 0.470, (p_2 = 0.402)$ | -6530.63 | M0 vs. M3<br>(K = 3) | 4 | < 0.0001 | None |
| MERPs (17 Taxa)     | $\omega_0 = 0.009, p_0 = 0.331, \omega_1 = 0.090,$<br>$p_1 = 0.418, \omega_2 = 0.482, (p_2 = 0.251)$ | -5929.25 | M0 vs. M3<br>(K = 3) | 4 | < 0.0001 | None |
| Basal (8 Taxa)      | $\omega_0 = 0.003, p_0 = 0.120, \omega_1 = 0.059,$<br>$p_1 = 0.757, \omega_2 = 0.382, (p_2 = 0.122)$ | -4972.79 | M0 vs. M3<br>(K = 3) | 4 | < 0.0001 | None |

**Site - Models (70 sequences dataset) [52-54]**

|                                         |                                                                                                      |           |                      |   |          |             |
|-----------------------------------------|------------------------------------------------------------------------------------------------------|-----------|----------------------|---|----------|-------------|
| <b>Model 0:</b> one-ratio               | $\omega_0 = 0.155$                                                                                   | -27658.44 |                      |   |          | None        |
| <b>Model 1a:</b> Nearly Neutral (K = 2) | $(\omega_0 = 0.155), p_0 = 0.818, (\omega_1 = 1),$<br>$(p_1 = 0.182)$                                | -27729.28 |                      |   |          | Not Allowed |
| <b>Model 3:</b> Discrete (K = 2)        | $\omega_0 = 0.0834, p_0 = 0.369, \omega_1 = 0.268,$<br>$(p_1 = 0.631)$                               | -27471.28 | M0 vs. M3<br>(K = 2) | 2 | < 0.0001 | None        |
| <b>Model 3:</b> Discrete (K = 3)        | $\omega_0 = 0.035, p_0 = 0.121, \omega_1 = 0.137,$<br>$p_1 = 0.430, \omega_2 = 0.320, (p_2 = 0.448)$ | -27402.19 | M0 vs. M3<br>(K = 3) | 4 | < 0.0001 | None        |

**Branch-Site Models (Testing PD branches for positive selection) [54-56]****PSS<sup>d</sup> for each lineage Prob ( $\omega > 1$ ) using BEB inference****Model A:**

|           |                                                                         |           |                                                                                                                                                   |
|-----------|-------------------------------------------------------------------------|-----------|---------------------------------------------------------------------------------------------------------------------------------------------------|
| FishBrain | $p_0 = 0.396, p_1 = 0.087,$<br>$(p_2 + p_3 = 0.517), \omega_2 = \infty$ | -27724.32 | <b>51W</b> ( $p = 0.975$ ), <b>126Q</b> ( $p = 0.951$ ), <b>186_</b> ( $p = 0.952$ )                                                              |
| FishTj    | $p_0 = 0.790, p_1 = 0.174,$<br>$(p_2 + p_3 = 0.036), \omega_2 = \infty$ | -27726.70 | <b>144S</b> ( $p = 0.643$ )                                                                                                                       |
| MERPs     | $p_0 = 0.587, p_1 = 0.127,$<br>$(p_2 + p_3 = 0.285), \omega_2 = \infty$ | -27717.96 | <b>86R</b> ( $p = 0.964$ ), <b>128W</b> ( $p = 0.993$ ), <b>196T</b> ( $p = 0.972$ ),<br><b>224S</b> ( $p = 0.973$ ), <b>231T</b> ( $p = 0.952$ ) |

**Model B:**

|           |                                                                                                                           |           |                      |   |        |                                                     |
|-----------|---------------------------------------------------------------------------------------------------------------------------|-----------|----------------------|---|--------|-----------------------------------------------------|
| FishBrain | $p_o = 0.257, p_1 = 0.436,$<br>$(p_2 + p_3 = 0.307), \omega_o = 0.083,$<br>$\omega_1 = 0.270, \omega_2 = \mathbf{1.983}$  | -27466.48 | MB vs. M3<br>(K = 2) | 2 | 0.0083 | Model B<br>fits the data<br>better than<br>M3 (K=2) |
| FishTj    | $p_o = 0.280, p_1 = 0.477,$<br>$(p_2 + p_3 = 0.243), \omega_o = 0.084,$<br>$\omega_1 = 0.268, \omega_2 = \mathbf{2.420}$  | -27471.28 | MB vs. M3<br>(K = 2) | 2 | 1.0    | N.S.                                                |
| MERPs     | $p_o = 0.315, p_1 = 0.530,$<br>$(p_2 + p_3 = 0.155), \omega_o = 0.084,$<br>$\omega_1 = 0.270, \omega_2 = \mathbf{18.170}$ | -27469.29 | MB vs. M3<br>(K = 2) | 2 | 0.1372 | N.S.                                                |

**Branch-Site Tests of Positive Selection**

|                                          |                                                                                                         |           | <b>Branch-site TEST 1<sup>e</sup></b> |              | <b>Branch-site TEST 2<sup>e</sup></b>     |                       |
|------------------------------------------|---------------------------------------------------------------------------------------------------------|-----------|---------------------------------------|--------------|-------------------------------------------|-----------------------|
| FishBrain (MA with $\omega_2 = 1$ Fixed) | $p_o = 0.422, p_1 = 0.094,$<br>$(p_2 + p_3 = 0.484), \omega_o = 0.155,$<br>$\omega_1 = 1, \omega_2 = 1$ | -27725.91 | MA vs. M1a<br>df = 2                  | $p = 0.0071$ | MA vs. MA<br>( $\omega_2 = 1$ )<br>df = 1 | $p = \mathbf{0.0747}$ |
| FishTj (MA with $\omega_2 = 1$ Fixed)    | $p_o = 0.741, p_1 = 0.165,$<br>$(p_2 + p_3 = 0.094), \omega_o = 0.155,$<br>$\omega_1 = 1, \omega_2 = 1$ | -27729.28 | MA vs. M1a<br>df = 2                  | $p = 0.0763$ | MA vs. MA<br>( $\omega_2 = 1$ )<br>df = 1 | $p = \mathbf{0.0233}$ |
| MERPs (MA with $\omega_2 = 1$ Fixed)     | $p_o = 0.570, p_1 = 0.124,$<br>$(p_2 + p_3 = 0.306), \omega_o = 0.154,$<br>$\omega_1 = 1, \omega_2 = 1$ | -27725.42 | MA vs. M1a<br>df = 2                  | $p < 0.0001$ | MA vs. MA<br>( $\omega_2 = 1$ )<br>df = 1 | $p = \mathbf{0.0001}$ |

<sup>a</sup>  $\ell$ , Log-likelihood scores.<sup>b</sup> LRT, likelihood ratio test.<sup>c</sup> df, Degrees of freedom.<sup>d</sup> PSS, Positively Selected Sites. Sites potentially under positive selection are identified using the human ependymin sequence [Eprdr\_Homo] as the reference.<sup>e</sup> TEST 1 and TEST 2 as defined in the Methods section of the main text [54-56]
